# Supplementary material
Source: PubMed Central journal article supplement (PMC4167461)

a.

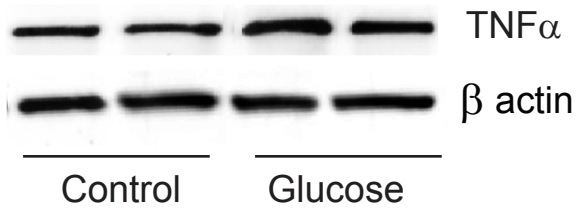

b.

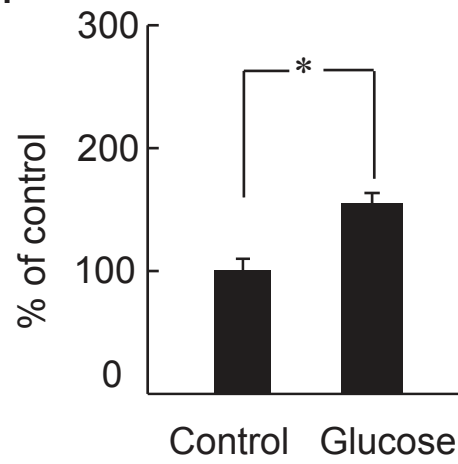

c.

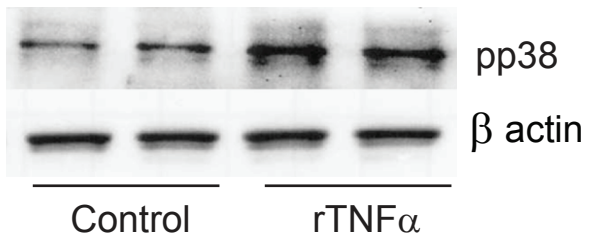

d.

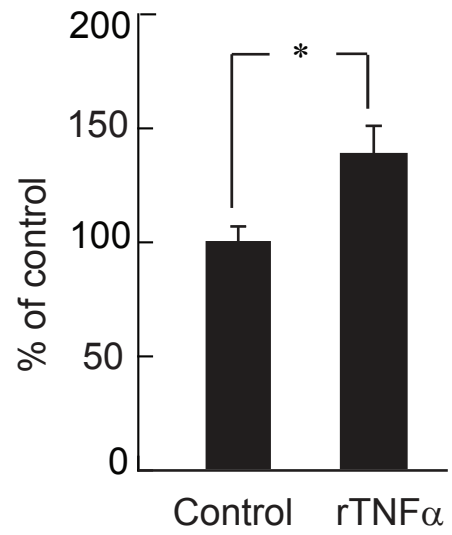

Supplement: NIHMS601951-supplement-01.pdf [file NIHMS601951-supplement-01.pdf]
